# Supplementary material for: Evaluation of Resistance Development to the Gwt1 Inhibitor Manogepix (APX001A) in Candida Species
Source: PubMed Central journal article supplement (PMC7187586; doi:10.1128/aac.01387-19), 2019-12-20
Supplement: AAC.01387-19-s0001.pdf [file AAC.01387-19-s0001.pdf]

1 **SUPPLEMENTARY INFORMATION**

2 **Table S1. Primers used for sequencing *GWT1* from *Candida* strains obtained in spontaneous**  
 3 **and serial passage experiments**

| <b>Species</b>         | <b>Primer Name</b> | <b>Primer Sequence</b>   |
|------------------------|--------------------|--------------------------|
| <i>C. albicans</i>     | MYA2876-1F         | GTAAAGAATCGAATTGACAACGG  |
| <i>C. albicans</i>     | MYA2876-1R         | GGTAACAACCTCAATTATGCGGGG |
| <i>C. albicans</i>     | MYA2876-2F         | CCAAACTGTTCCTACTGAACAACC |
| <i>C. albicans</i>     | MYA2876-2R         | GGATGCTAGAATTGTCAACAC    |
| <i>C. albicans</i>     | MYA2876-3Fnew      | GCTGTAACCAGTATAGCATTATC  |
| <i>C. albicans</i>     | MYA2876-3R         | GGCACTGACTTGATAAAGTTCTGC |
| <i>C. albicans</i>     | MYA2876-4F         | CCCAAGAAGATTTGCCAAAG     |
| <i>C. albicans</i>     | MYA2876-4R         | GTTCTTTGTTTTGTAGCCTG     |
| <i>C. albicans</i>     | MYA2876-5F         | GAAGTTCATTTTGAGCAGCG     |
| <i>C. albicans</i>     | MYA2876-5R         | CACATCTATGGTATGATAACC    |
| <i>C. glabrata</i>     | glabrata-F         | CGTTAACATTAGCAATGTCCG    |
| <i>C. glabrata</i>     | glabrata-R         | CACACTCTTCCGCAATCAAG     |
| <i>C. glabrata</i>     | glabrata-SeqF1     | TAACTGGGTTGCTATGCTTC     |
| <i>C. glabrata</i>     | glabrata-SeqF2     | TAGTCTATTAACCTACTTGG     |
| <i>C. glabrata</i>     | glabrata-SeqR1     | ATCCAATGGTTTGTCCCAT      |
| <i>C. glabrata</i>     | glabrata-SeqR2     | ATAGTTGAGAAGAAACCACC     |
| <i>C. parapsilosis</i> | MYA-4646-F         | ATCCAATGAGGTTGATGTGG     |
| <i>C. parapsilosis</i> | MYA-4646-R         | GTTACACAGTAAAACACTCG     |
| <i>C. parapsilosis</i> | MYA-4646-SeqF1     | ACTATACAAGCAAAAAGAGG     |
| <i>C. parapsilosis</i> | MYA-4646-SeqF2     | ATCGTTTGGATCGTTTGTCC     |
| <i>C. parapsilosis</i> | MYA-4646-SeqR1     | AAAATGAGTATATCCCTTCC     |

---

|                        |                |                        |
|------------------------|----------------|------------------------|
| <i>C. parapsilosis</i> | MYA-4646-SeqR2 | GCAAAAACATGAGTAGTGATGG |
| <i>C. parapsilosis</i> | MYA-4646-SeqF  | CCATCAACAAAAGATAGCTG   |

---

4

5
